# Supplementary material
Source: PubMed Central journal article supplement (PMC3318833)
Supplement: supp_78.8.2841_AEM7274-11_supplemental_methods.pdf [file supp_78.8.2841_AEM7274-11_supplemental_methods.pdf]

## **SUPPLEMENTAL INFORMATION 1**

### **Pathogenicity and infection cycle of *Vibrio owensii* in larviculture of ornate spiny lobster (*Panulirus ornatus*)**

Evan F. Goulden<sup>1,2</sup>, Michael R. Hall<sup>1</sup>, David G. Bourne<sup>1</sup>, Lily L. Pereg<sup>2</sup>, and Lone Høj<sup>1\*</sup>

<sup>1</sup> Australian Institute of Marine Science, Townsville, Queensland, Australia, 4810.

<sup>2</sup> Research Centre for Molecular Biology, School of Science and Technology, University of New  
England, Armidale, New South Wales, Australia, 2351.

## SUPPLEMENTAL METHODS

**Transconjugation.** Donor, helper and recipient strains were cultured in LB broth with 40  $\mu\text{g mL}^{-1}$  kanamycin (for helper and gfp-donor) or LB20 broth (5  $\text{g L}^{-1}$  yeast extract, 10  $\text{g L}^{-1}$  neutralized peptone, 20  $\text{g L}^{-1}$  NaCl; for *V. owensii* DY05) for 24 h at 30°C before subculture in the respective media for a further 16 h. Two hundred and fifty microlitres of each helper, donor and recipient subculture were combined in a microfuge tube, centrifuged (5200 g for 5 min) and the pellet resuspended in 200  $\mu\text{L}$  30°C LB20 without antibiotics. Fifty microlitres of the mixed culture was spot inoculated onto LB20 agar (5  $\text{g L}^{-1}$  yeast extract, 10  $\text{g L}^{-1}$  neutralized peptone, 20  $\text{g L}^{-1}$  NaCl, 1.5% agar) and incubated for 24 h at 30°C. The mixed bacterial colonies were streak inoculated onto selective LB20 agar plates (supplemented with 40  $\mu\text{g mL}^{-1}$  kanamycin and 50  $\mu\text{g mL}^{-1}$  colistin) and incubated for 24 h at 30°C. Fluorescent transconjugant colonies were detected using a blue light transilluminator and re-streaked on *Vibrionaceae*-selective thiosulfate citrate bile sucrose agar plates (TCBS). TCBS-viable colonies were re-checked under blue light to substantiate gfp expression. Isolates were cryopreserved at -80°C in 30% glycerol with LB20 supplemented with 40  $\mu\text{g mL}^{-1}$  kanamycin.

**Expression of gfp.** *V. owensii* DY05[gfp] was assessed for stable expression of gfp by continuous subculture in media without antibiotic selection pressure. DY05[gfp] was precultured on selective LB20 agar for 24 h at 28°C, and in triplicate, a single fluorescent colony was inoculated with 5 mL MB without antibiotics and cultured for 24 h (28°C, 170 rpm). The cultures were continuously subcultured in MB by transferring a 100  $\mu\text{L}$  aliquot to 5 mL of MB every 24 h. Subcultures were sampled by spiral plating (Eddy Jet; IUL) on marine agar (MA; Becton, Dickinson and Company), incubation overnight (28°C) and enumeration by an automatic colony counter (Flash and Grow v1.2; IUL).

**Growth of transconjugants.** The growth curve of DY05[*gfp*] was compared to wild type *V. owensii* DY05 using a modified microgrowth assay (1). *V. owensii* DY05 and DY05[*gfp*] were revived on agar media as described previously, colony material was suspended in 2 mL PBS (8 g L<sup>-1</sup> NaCl; 0.2 g L<sup>-1</sup> KCl; 1.44 g L<sup>-1</sup> Na<sub>2</sub>HPO<sub>4</sub>; 0.24 g L<sup>-1</sup> KH<sub>2</sub>PO<sub>4</sub>; pH 7.2) and suspensions were adjusted to absorbance OD<sub>600nm</sub> 0.1 (Nanodrop ND1000). Total viable counts (expressed as CFU mL<sup>-1</sup>) were determined for each bacterial strain by spiral plating as described previously. MB was inoculated with PBS suspensions of *V. owensii* DY05 or DY05[*gfp*] at an initial concentration of 1 x 10<sup>3</sup> CFU mL<sup>-1</sup> in a Nunc™ (NUN167008) 96-well microtitre plate (final well volume 200 µL). Treatments were performed in hexuplicate well sets. Perimeter rows and columns were loaded with 200 µL sterile milli-Q water to minimize evaporative loss and plate covers were made hydrophilic by treatment with 0.1% Triton X-100 in 20% ethanol to smooth condensation. Plates were sealed with parafilm and incubated at 28°C with agitation (170 rpm) and growth of the strains was monitored by absorbance (OD<sub>595nm</sub>) with a Wallac Victor<sup>2</sup> 1420 multilabel counter. Measurements were adjusted by subtracting the average background noise generated from a MB control.

## REFERENCES

1. Brewster, J.D. 2003. A simple micro-growth assay for enumerating bacteria. *J. Microbiol. Meth.* **53**: 77-86.
