# Supplementary material
Source: PubMed Central journal article supplement (PMC3318833)
Supplement: supp_78.8.2841_AEM7274-11_TableS1-FigS1.pdf [file supp_78.8.2841_AEM7274-11_TableS1-FigS1.pdf]

## SUPPLEMENTAL INFORMATION 2

### **Pathogenicity and infection cycle of *Vibrio owensii* in larviculture of ornate spiny lobster (*Panulirus ornatus*)**

Evan F. Goulden<sup>1,2</sup>, Michael R. Hall<sup>1</sup>, David G. Bourne<sup>1</sup>, Lily L. Pereg<sup>2</sup>, and Lone Høj<sup>1\*</sup>

<sup>1</sup> Australian Institute of Marine Science, Townsville, Queensland, Australia, 4810.

<sup>2</sup> Research Centre for Molecular Biology, School of Science and Technology, University of New  
England, Armidale, New South Wales, Australia, 2351.

## SUPPLEMENTAL RESULTS

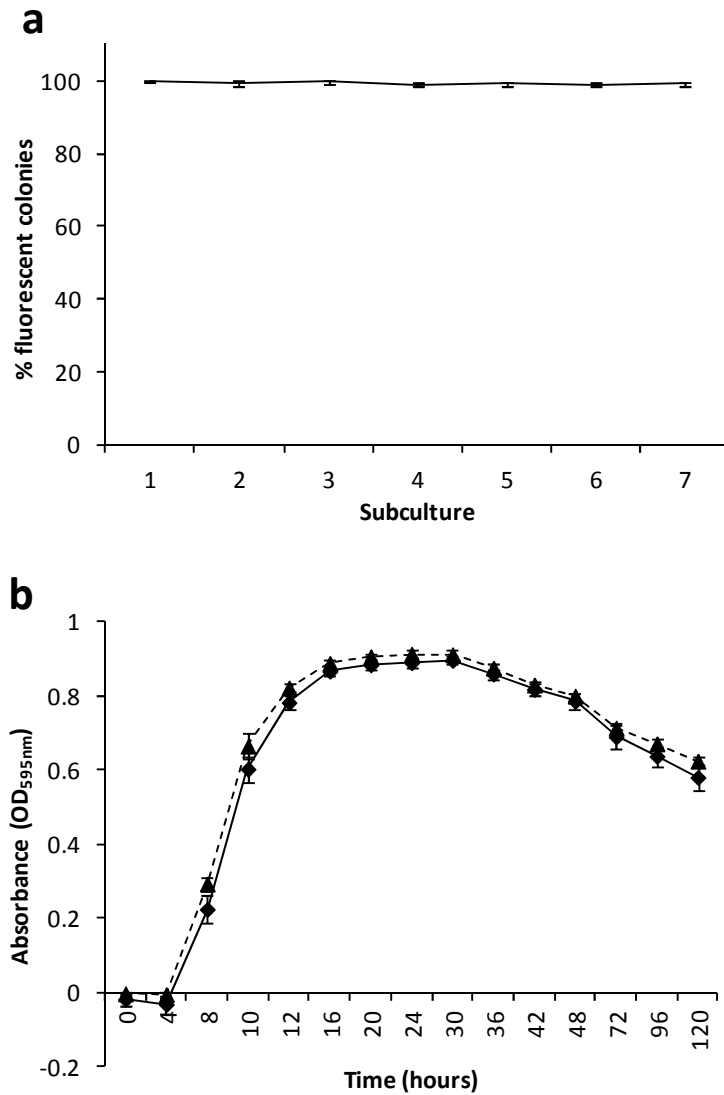

**FIG. S1.** Stability of *gfp* expression and effects of transconjugation on growth of *V. owensii* DY05. (a) Expression of *gfp* by DY05[*gfp*] following continuous subculture for 7 days in nonselective medium (MB). (b) Microgrowth profiles of wild type *V. owensii* DY05 (▲) and DY05[*gfp*] (◆) over 120 h. Shown are means  $\pm$  SD.

**TABLE S1.** Phylogenetic identity of isolates recovered from stage 3 *P. ornatus* phyllosoma and *Artemia* following vectored challenge

| Isolate | Treatment and time (h) of sampling | Source              | Gene                                   | Nearest taxonomic relative (accession number)                                                              | Sequence identity (%)                                            |
|---------|------------------------------------|---------------------|----------------------------------------|------------------------------------------------------------------------------------------------------------|------------------------------------------------------------------|
| A01     | <i>V. owensii</i> DY05 t = 2       | Live <i>Artemia</i> | 16S rRNA<br><i>topA</i><br><i>mreB</i> | <i>V. owensii</i> DY05 (GU018180)<br><i>V. owensii</i> DY05(GU111255)<br><i>V. owensii</i> DY05 (GU111259) | 1420/1421 (99%) <sup>a</sup><br>625/625 (100%)<br>860/860 (100%) |
| A06     | Control t=0                        | Live phyllosoma     | 16S rRNA                               | <i>V. parahaemolyticus</i> (GU726844)                                                                      | 1400/1402 (99%)                                                  |
| A07     | Control t=0                        | Live phyllosoma     | 16S rRNA                               | <i>V. harveyi</i> (DQ146937)                                                                               | 1414/1414 (100%)                                                 |
| A08     | Control t=0                        | Live phyllosoma     | 16S rRNA                               | <i>V. neptunus</i> (NR025476)                                                                              | 1408/1422 (99%)                                                  |
| A09     | Control t=0                        | Live phyllosoma     | 16S rRNA                               | <i>V. parahaemolyticus</i> (EU660326)                                                                      | 1427/1430 (99%)                                                  |
| A10     | Control t=0                        | Live phyllosoma     | 16S rRNA                               | <i>V. harveyi</i> (DQ146937)                                                                               | 1422/1423 (99%)                                                  |
| A39     | Control t =48                      | Dead phyllosoma     | 16S rRNA                               | <i>V. neptunus</i> (NR025476)                                                                              | 1414/1427 (99%)                                                  |
| A40     | Control t =48                      | Dead phyllosoma     | 16S rRNA                               | <i>V. harveyi</i> (AM422800)                                                                               | 1414/1418 (99%)                                                  |
| A41     | Control t =48                      | Dead phyllosoma     | 16S rRNA                               | <i>V. neptunus</i> (NR025476)                                                                              | 1406/1420 (99%)                                                  |
| A42     | Control t =48                      | Dead phyllosoma     | 16S rRNA                               | <i>V. neptunus</i> (NR025476)                                                                              | 1404/1418 (99%)                                                  |
| A43     | Control t =48                      | Dead phyllosoma     | 16S rRNA                               | <i>V. parahaemolyticus</i> (EU660326)                                                                      | 1422/1424 (99%)                                                  |
| A44     | Control t =48                      | Dead phyllosoma     | 16S rRNA                               | <i>V. neptunus</i> (NR025476)                                                                              | 1409/1424 (99%)                                                  |
| A37     | <i>V. owensii</i> DY05 t = 48      | Dead phyllosoma     | 16S rRNA                               | <i>V. neptunus</i> (NR025476)                                                                              | 1395/1408 (99%)                                                  |
| A45     | <i>V. owensii</i> DY05 t = 48      | Dead phyllosoma     | 16S rRNA<br><i>topA</i><br><i>mreB</i> | <i>V. owensii</i> DY05 (GU018180)<br><i>V. owensii</i> DY05(GU111255)<br><i>V. owensii</i> DY05 (GU111259) | 1420/1421 (99%) <sup>a</sup><br>625/625 (100%)<br>860/860 (100%) |
| A46     | <i>V. owensii</i> DY05 t = 48      | Dead phyllosoma     | 16S rRNA<br><i>topA</i><br><i>mreB</i> | <i>V. owensii</i> DY05 (GU018180)<br><i>V. owensii</i> DY05(GU111255)<br><i>V. owensii</i> DY05 (GU111259) | 1420/1421 (99%) <sup>a</sup><br>625/625 (100%)<br>860/860 (100%) |
| A47     | <i>V. owensii</i> DY05 t = 48      | Dead phyllosoma     | 16S rRNA<br><i>topA</i><br><i>mreB</i> | <i>V. owensii</i> DY05 (GU018180)<br><i>V. owensii</i> DY05(GU111255)<br><i>V. owensii</i> DY05 (GU111259) | 1420/1421 (99%) <sup>a</sup><br>625/625 (100%)<br>860/860 (100%) |
| A49     | <i>V. owensii</i> DY05 t = 48      | Dead phyllosoma     | 16S rRNA<br><i>topA</i><br><i>mreB</i> | <i>V. owensii</i> DY05 (GU018180)<br><i>V. owensii</i> DY05(GU111255)<br><i>V. owensii</i> DY05 (GU111259) | 1420/1421 (99%) <sup>a</sup><br>625/625 (100%)<br>860/860 (100%) |
| A50     | <i>V. owensii</i> DY05 t = 48      | Dead phyllosoma     | 16S rRNA<br><i>topA</i><br><i>mreB</i> | <i>V. owensii</i> DY05 (GU018180)<br><i>V. owensii</i> DY05(GU111255)<br><i>V. owensii</i> DY05 (GU111259) | 1390/1391 (99%) <sup>a</sup><br>625/625 (100%)<br>860/860 (100%) |

<sup>a</sup> One bp mismatch due to an uncertain nucleotide position ‘n’ in the BLAST database sequence.
